# Supplementary material
Source: PubMed Central journal article supplement (PMC6706076)
Supplement: NIHMS1043298-supplement-supp_table_1.pdf [file NIHMS1043298-supplement-supp_table_1.pdf]

| Supplemental Table 1: Quality Assessment |                                     |                                    |                                                           |                                                     |                                       |                                                                             |                                                                      |                                                                        |                                                            |                 |
|------------------------------------------|-------------------------------------|------------------------------------|-----------------------------------------------------------|-----------------------------------------------------|---------------------------------------|-----------------------------------------------------------------------------|----------------------------------------------------------------------|------------------------------------------------------------------------|------------------------------------------------------------|-----------------|
| First Author (year)                      | Criterion 1                         |                                    |                                                           | Criterion 2                                         |                                       |                                                                             |                                                                      |                                                                        | Criterion 3                                                | Quality rating: |
|                                          | Used an intention to treat analysis | Achieved an attrition rate of <20% | Compared characteristics of completers and non-completers | Description of the process of designing the program | Description of the enrollment program | Documentation of session attendance, reporting costs and/or resource inputs | Documentation of the training process or qualifications of personnel | Description of the qualitative feedback from participants or providers | Had an arm of randomized, matched, or unmatched comparison |                 |
| Andersen (2010)                          |                                     | •                                  |                                                           | •                                                   |                                       | •                                                                           | •                                                                    |                                                                        | •                                                          | High            |
| Andersen (2014) A                        | •                                   | •                                  |                                                           | •                                                   |                                       | •                                                                           | •                                                                    |                                                                        | •                                                          | High            |
| Andersen (2014) B                        |                                     | •                                  |                                                           | •                                                   | •                                     | •                                                                           | •                                                                    |                                                                        | •                                                          |                 |
| Andersen (2014) C                        |                                     | •                                  |                                                           | •                                                   | •                                     | •                                                                           | •                                                                    |                                                                        | •                                                          | High            |
| Andersen (2016)                          |                                     | •                                  |                                                           | •                                                   | •                                     | •                                                                           |                                                                      |                                                                        | •                                                          | High            |
| Bangsbo (2010)                           |                                     |                                    |                                                           | •                                                   |                                       | •                                                                           |                                                                      |                                                                        | •                                                          |                 |
| Barene (2014) A                          | •                                   | •                                  |                                                           | •                                                   | •                                     | •                                                                           | •                                                                    |                                                                        | •                                                          | High            |
| Barene (2014) B                          | •                                   | •                                  |                                                           | •                                                   | •                                     | •                                                                           | •                                                                    |                                                                        | •                                                          | High            |
| Connolly (2014)                          |                                     |                                    |                                                           | •                                                   | •                                     | •                                                                           | •                                                                    |                                                                        | •                                                          | High            |
| de Sousa (2014)                          |                                     | •                                  |                                                           | •                                                   |                                       |                                                                             | •                                                                    |                                                                        | •                                                          |                 |
| Filliau (2015)                           |                                     |                                    |                                                           | •                                                   | •                                     | •                                                                           | •                                                                    |                                                                        |                                                            |                 |
| Knoepfl-Lenzin (2010)                    |                                     | •                                  |                                                           | •                                                   |                                       | •                                                                           | •                                                                    |                                                                        | •                                                          | High            |
| Krustrup (2009)                          |                                     | •                                  | •                                                         | •                                                   | •                                     | •                                                                           | •                                                                    |                                                                        | •                                                          | High            |
| Krustrup (2010) A                        |                                     | •                                  |                                                           | •                                                   |                                       | •                                                                           |                                                                      |                                                                        | •                                                          | High            |
| Krustrup (2010) B                        |                                     | •                                  |                                                           | •                                                   |                                       | •                                                                           |                                                                      |                                                                        | •                                                          |                 |
| Krustrup (2013)                          | •                                   | •                                  |                                                           | •                                                   |                                       | •                                                                           |                                                                      |                                                                        | •                                                          | High            |
| Mendham (2015)                           |                                     | •                                  |                                                           | •                                                   | •                                     | •                                                                           | •                                                                    |                                                                        | •                                                          | High            |
| Milanovic (2015)                         |                                     | •                                  |                                                           | •                                                   |                                       | •                                                                           |                                                                      |                                                                        | •                                                          | High            |
| Mohr (2014)                              |                                     | •                                  |                                                           | •                                                   |                                       | •                                                                           | •                                                                    |                                                                        | •                                                          | High            |
| Randers (2010)                           |                                     | •                                  |                                                           | •                                                   | •                                     | •                                                                           |                                                                      |                                                                        | •                                                          |                 |
| Randers (2012)                           |                                     |                                    | •                                                         | •                                                   | •                                     | •                                                                           | •                                                                    |                                                                        | •                                                          | High            |
| Schmidt (2013)                           |                                     |                                    |                                                           | •                                                   | •                                     | •                                                                           |                                                                      |                                                                        | •                                                          |                 |
| Schmidt (2014)                           |                                     | •                                  |                                                           | •                                                   | •                                     | •                                                                           | •                                                                    | •                                                                      | •                                                          | High            |
