# Supplementary material
Source: PubMed Central journal article supplement (PMC6706076)

**Supplemental Figure 1: Funnel plots for all outcomes**

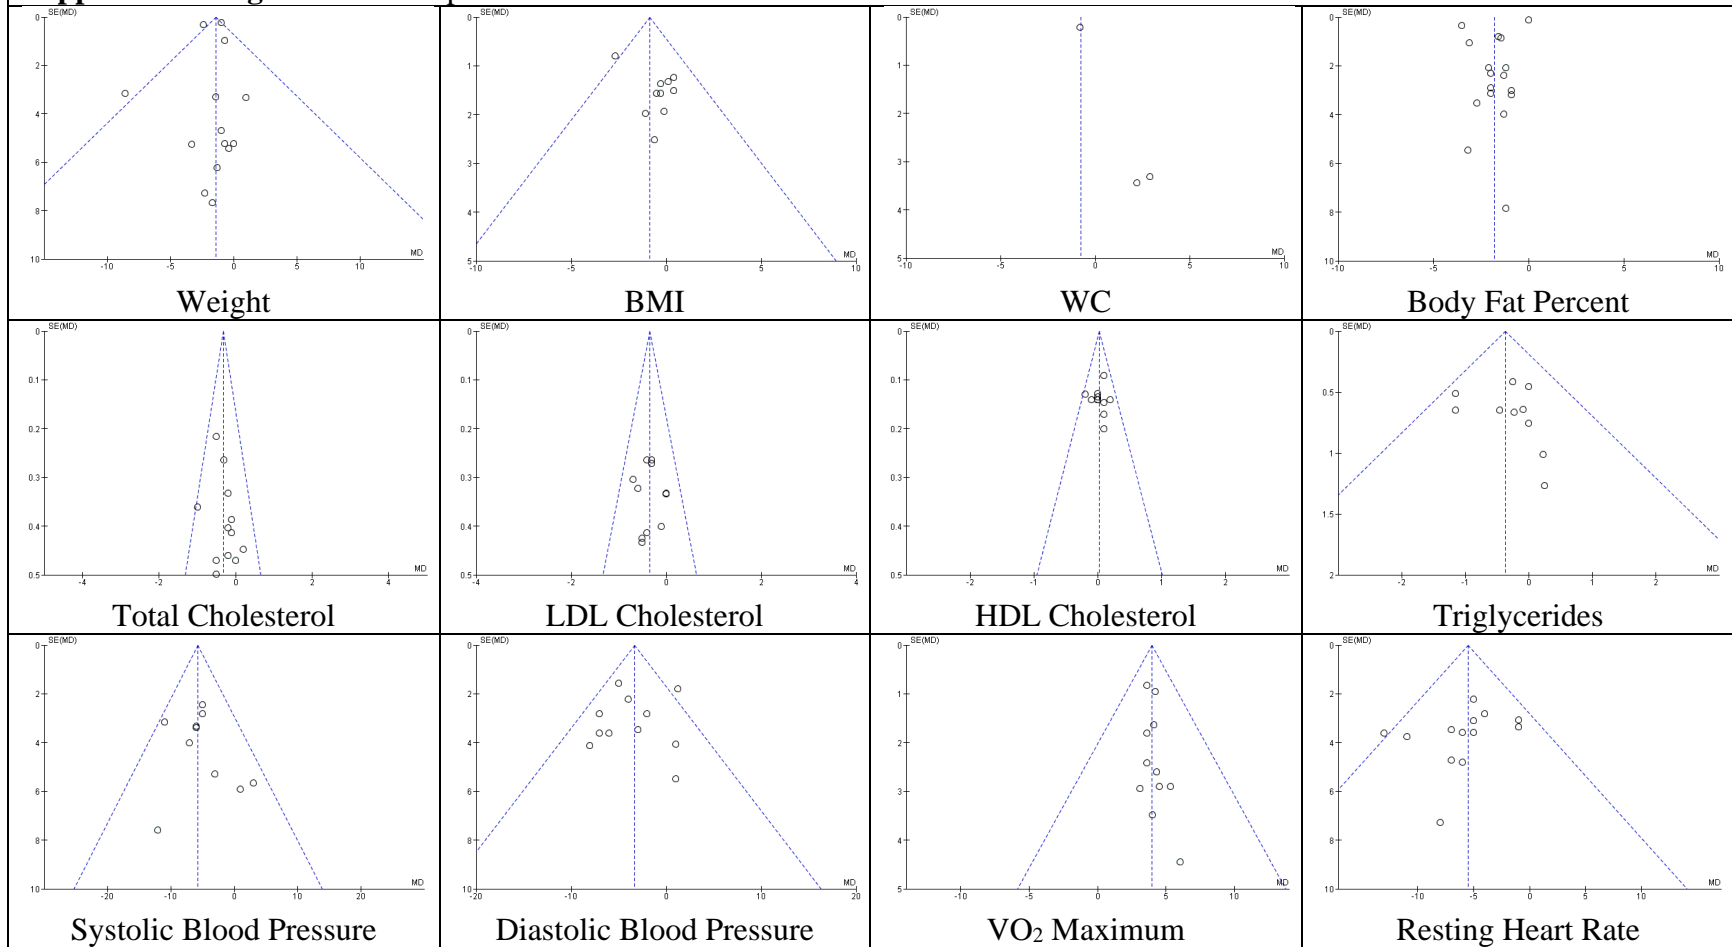

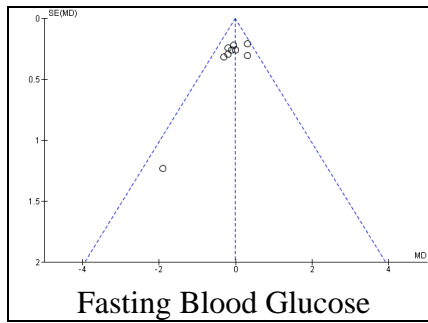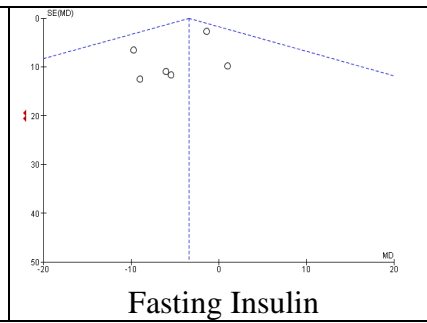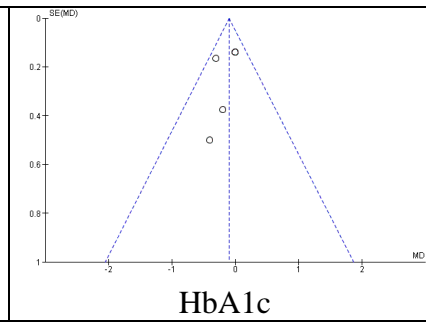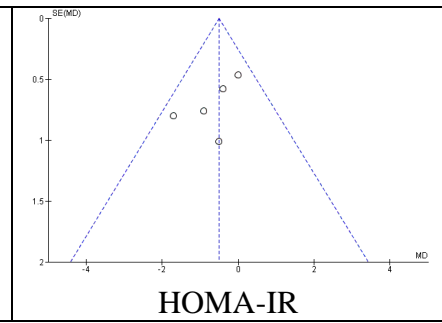

Supplement: NIHMS1043298-supplement-supp_figure_1.pdf [file NIHMS1043298-supplement-supp_figure_1.pdf]
